# Supplementary material for: The Integrative Method Based on the Module-Network for Identifying Driver Genes in Cancer Subtypes
Source: PubMed Central journal article supplement (PMC6099653; doi:10.3390/molecules23020183), 2018-01-24
Supplement: molecules-23-00183-s001.pdf [file molecules-23-00183-s001.pdf]

The main code is provided in "<https://github.com/lixing000/Module-Net>".
